# Supplementary material
Source: PubMed Central journal article supplement (PMC7164797)
Supplement: mmc1.pdf [file mmc1.pdf]

# THE LANCET Infectious Diseases

## Supplementary webappendix

This webappendix formed part of the original submission and has been peer reviewed. We post it as supplied by the authors.

Supplement to: Tang JW, Lam TT, Zaraket H, et al, and the INSPIRE investigators. Global epidemiology of non-influenza RNA respiratory viruses: data gaps and a growing need for surveillance. *Lancet Infect Dis* 2017; published online April 27. [http://dx.doi.org/10.1016/S1473-3099\(17\)30238-4](http://dx.doi.org/10.1016/S1473-3099(17)30238-4).

INSPIRE (International Network for the Sequencing of resPIRratory vIrusEs: <http://www.global-inspire.org/>) are (in alphabetical order):

**Authors/ Affiliations:**

1. Asha Mary Abraham, Christian Medical College, Vellore, India.
2. Amal Baraket, Centre National de référence de la grippe, Rabat, Morocco.
3. Seweryn Bialasiewicz, Child Health Research Centre, The University of Queensland, Brisbane, Australia.
4. Miguela A Caniza, St Jude Children's Research Hospital, Memphis, TN, USA.
5. Paul KS Chan, The Chinese University of Hong Kong SAR, Hong Kong, China.
6. Cheryl Cohen, National Institute for Communicable Diseases (NICD); University of the Witwatersrand, Johannesburg, South Africa
7. André Corriveau, Government of the Northwest Territories, Yellowknife, NT, Canada.
8. Benjamin J Cowling, The University of Hong Kong, Hong Kong SAR, China.
9. Steven J Drews, Alberta Provincial Laboratory for Public Health, University of Alberta, Edmonton, AB, Canada.
10. Marcela Echavarría, Centro de Educación Médica e Investigaciones Clínicas, Buenos Aires, Argentina.
11. Ron Fouchier, Erasmus Medical Centre, Rotterdam, The Netherlands.
12. Pieter LA Fraaij, Erasmus Medical Centre, Rotterdam, The Netherlands.
13. Todd F Hachette, Dalhousie University, Halifax, NS, Canada.
14. Jean-Michel Heraud, Institut Pasteur of Madagascar, Antananarivo, Madagascar.
15. Hamid Jalal, Addenbrookes Hospital, Cambridge, UK.
16. Lance Jennings, University of Otago, Christchurch, New Zealand.
17. Alice Kabanda, National Reference Laboratory, Kigali, Rwanda.
18. Herve A Kadjo, Pasteur Institute, Abidjan, Côte d'Ivoire.
19. Mohammed Rafiq Khanani, Dow University of Health Sciences, Karachi, Pakistan.
20. Evelyn SC Koay, National University of Singapore, Singapore.
21. Marion P Koopmans, Erasmus Medical Centre, Rotterdam, The Netherlands.
22. Mel Krajden, British Columbia Centre for Disease Prevention and Control, Vancouver, BC, Canada.
23. Tommy T Lam, The University of Hong Kong, Hong Kong SAR, China.
24. Hong Kai Lee, National University Hospital, Singapore.
25. W. Ian Lipkin, Columbia University, New York, NY, USA.
26. Julius Lutwama, National Influenza Center, UVRI, Entebbe, Uganda.
27. David Marchant, University of Alberta, Edmonton, AB, Canada.
28. Hidekazu Nishimura, Sendai Medical Center, Sendai, Japan.
29. Pagbajabyn Nymadawa, Ulaanbaatar, Mongolia.
30. Benjamin A Pinsky, Stanford University School of Medicine, Stanford, CA, USA.
31. Sanjiv Rughooputh, Central Health Laboratory, Caudes, Mauritius.
32. Joseph Rukelibuga, National Reference Laboratory, Kigali, Rwanda.
33. Taslimarif Saiyed, Centre for Cellular and Molecular Platforms, Bangalore, India.
34. Anita Shet, St. John's Medical College Hospital, Bangalore, India.
35. Theo Sloots, University of Queensland, Brisbane, Australia.
36. JJ Muyembe Tamfum, Institut National de Recherche Biomédicale (INRB), Kinshasa Gombe, Democratic Republic of Congo.
37. Julian W Tang, University Hospitals of Leicester NHS Trust/University of Leicester, Leicester, UK.
38. Stefano Tempia, National Institute for Communicable Diseases, Sandringham, South Africa.
39. Sarah Tozer, Child Health Research Centre, The University of Queensland, Brisbane, Australia.
40. Florette Treurnicht, National Institute for Communicable Diseases, Sandringham, South Africa.
41. Matti Waris, University of Turku, Turku, Finland.
42. Aripuana Watanabe, Federal University of Juiz de Fora, Juiz de Fora, Brazil.
43. Emile Okitolonda Wemakoy, Université de Kinshasa, Kinshasa, Democratic Republic of Congo.
44. Hassan Zaraket, American University of Beirut, Beirut, Lebanon.
